# Supplementary material for: Medullary Pancreatic Carcinoma Due to Somatic POLE Mutation: A Distinctive Pancreatic Carcinoma With Marked Long-Term Survival
Source: PubMed Central journal article supplement — Pancreas. 2020 Jul 13;49(7):999–1003. doi: 10.1097/MPA.0000000000001588 (PMC7368848; doi:10.1097/mpa.0000000000001588), 2020-07-13
Supplement: mpa-49-999-s001.pdf [file mpa-49-999-s001.pdf]

# Medullary Pancreatic Carcinoma Due to Somatic *POLE* Mutation

## *A Distinctive Pancreatic Carcinoma With Marked Long-Term Survival*

### SUPPLEMENTAL DIGITAL CONTENT

**SUPPLEMENTAL TABLE 1.** Immunohistochemistry, Methods, and List of Antibodies

| Antibody Name | Clone       | Dilution | Supplier   |
|---------------|-------------|----------|------------|
| β-catenin     | 14          | 1:40     | Cellmarque |
| BCL10         | 331.3       | 1:400    | Santa Cruz |
| CD4           | SP35        | 1:35     | Cellmarque |
| CD8           | M7103       | 1:100    | Dako       |
| CD10          | 56C6        | 1:80     | Novocastra |
| Cytokeratin 7 | OV-TL 12/30 | 1:6400   | Biogenex   |
| Granzyme B    | GrB-7       | 1:300    | Monosan    |
| MLH1          | G168-15     | 1:20     | Pharmingen |
| MSH2          | G219-1129   | 1:50     | Cellmarque |
| MSH6          | EPR3945     | 1:200    | Abcam      |
| PMS2          | EPR3947     | 1:25     | Cellmarque |
| p53           | DO-7        | 1:6000   | Dako       |
| SMAD4         | EP6184      | 1:800    | Abcam      |

Immunohistochemistry was performed using standard conditions in the Benchmark Ultra autostainer (Ventana Medical Systems, Inc. A Member of the Roche Group, Tucson, Ariz.) with the listed antibodies.

**SUPPLEMENTAL TABLE 2.** DNA Sequencing and Microsatellite Analysis

| Gene                      | Accession No.                     | Codon                                                               |
|---------------------------|-----------------------------------|---------------------------------------------------------------------|
| <i>AKT1</i>               | NM_005163.2                       | 17                                                                  |
| <i>AKT2</i>               | NM_001626.5                       | 17                                                                  |
| <i>AKT3</i>               | NM_181690.2                       | 17                                                                  |
| <i>ALK*</i>               | NM_004304.4                       | 1059-1150, 1173-1278                                                |
| <i>ARAF</i>               | NM_001654.4                       | 214                                                                 |
| <i>BRAF*</i>              | NM_004333.4                       | 455-488, 566-580, 594-605                                           |
| <i>CTNNB1</i>             | NM_001904.3                       | 19-48                                                               |
| <i>DDR2</i>               | NM_006182.2                       | 503-856                                                             |
| <i>EGFR*</i>              | NM_005228.4                       | 434-499, 688-875                                                    |
| <i>ERBB2*</i>             | NM_004448.3                       | 310, 650-695, 737-883                                               |
| <i>FGFR1</i> <sup>†</sup> | NM_001174063.1                    |                                                                     |
| <i>FGFR2</i> <sup>†</sup> | NM_000141.4                       |                                                                     |
| <i>FGFR3</i> <sup>†</sup> | NM_000142.4                       |                                                                     |
| <i>GNAI1</i>              | NM_002067.4                       | 183, 209                                                            |
| <i>GNAQ</i>               | NM_002072.4                       | 183, 209                                                            |
| <i>GNAS</i>               | NM_000516.5                       | 201, 227                                                            |
| <i>HRAS</i>               | NM_005343.3                       | 12, 13, 59, 61                                                      |
| <i>IDH1</i>               | NM_005896.3                       | 132                                                                 |
| <i>IDH2</i>               | NM_002168.3                       | 140, 172                                                            |
| <i>JAK2</i>               | NM_004972.3                       | 617                                                                 |
| <i>KIT*</i>               | NM_000222.2                       | 412-513, 550-591, 640-787, 799-850                                  |
| <i>KRAS*</i>              | NM_004985.4                       | 12, 13, 59, 61, 117, 146                                            |
| <i>MAP2K1</i>             | NM_002755.3                       | 28-231                                                              |
| <i>MDM2</i> <sup>†</sup>  | NM_002392.5                       |                                                                     |
| <i>MET*</i>               | NM_001127500.2                    | 168, 375, 982-1027, 1230-1284, 1304, including exon 14 (-90, +20bp) |
| <i>MTOR</i>               | NM_004958.3                       | 1458-1489, 1789-1820, 1971-1995, 2194-2220, 2404-2433, 2484-2509    |
| <i>NRAS</i>               | NM_002524.4                       | 12, 13, 59, 61, 117, 146                                            |
| <i>PDGFRA*</i>            | NM_006206.5                       | 552-595, 632-667, 824-848                                           |
| <i>PIK3CA*</i>            | NM_006218.3                       | 345, 420, 539-554, 1043-1050                                        |
| <i>POLE</i>               | NM_006231.3                       | 268-491                                                             |
| <i>PTEN</i>               | NM_000314.6                       | 86-267, 276-342                                                     |
| <i>RAF1</i>               | NM_002880.3                       | 257-261                                                             |
| <i>ROS1</i>               | NM_002944.2                       | 1927-2189                                                           |
| <i>TP53</i>               | NM_000546.5                       | >94% of the coding regions                                          |
| Markers for MSI analysis  | BAT25, BAT26, NR21, NR24 and NR27 |                                                                     |

Genomic DNA was isolated from deparaffinized formalin-fixed paraffin-embedded tumor and normal tissue using standard procedures. Library preparation and sequencing using a single-molecule molecular inversion probe (smMIP)-based NextSeq 500 approach were performed as described previously,<sup>1</sup> with the listed gene panel.

Using a separate smMIP panel, 99% of the coding region of *SMAD4* (*SMAD4* RefSeq NM\_005359.5) was analyzed.

\*For detection of point mutations and amplification.

<sup>†</sup>For amplification detection.

MSI, microsatellite instability.

## SUPPLEMENTAL METHODS

### Tumor Mutational Burden Analysis

Tumor mutational burden (TMB) was determined using the TruSight™ Oncology 500 kit (early access program, Illumina, Inc., San Diego, Calif) according to the manufacturer's protocol. 40 ng DNA was used as input. The kit makes use of a hybrid-based capture technology using probes for 523 cancer-related genes (1.94 Mb). The TMB was determined using the bioinformatic pipeline provided by Illumina. This pipeline identifies all variants (single nucleotide variants and indels) in the coding region with a VAF >5%, and subsequently removes germline variants, driver mutations and synonymous variants. Finally, the number of remaining variants is divided by the target region covered with more than 50 unique reads (based on unique molecular identifiers) to determine the number of nonsynonymous mutations/Mb. Mutational signature analysis was performed as described previously.<sup>2</sup> The MPC described in the current paper is represented as UPN40 in Kroeze et al.<sup>2</sup> In Figure 5 of the Kroeze et al study, the high contribution of signature 10a and 10b is demonstrated.<sup>2</sup>

**SUPPLEMENTAL TABLE 3.** The Complete List of Tumor-Specific Somatic Variants

| Gene           | Hgvs_g                    | Hgvs_c                                 | Hgvs_p                         | % Variation (VAF) | COSMIC IDs (COSMIC v86)                     |
|----------------|---------------------------|----------------------------------------|--------------------------------|-------------------|---------------------------------------------|
| <i>JAK2</i>    | 9:g.5055687G>A            | ENST00000381652.3_2.1:c.955G>A         | ENSP00000371067.3:p.Asp319Asn  | 48,97959184       | COSM179108                                  |
| <i>FGFR2</i>   | 10:g.123241363T>G         | ENST00000360144.7_2.1:c.*323A>C        |                                | 46,66666667       |                                             |
| <i>CDC73</i>   | 1:g.193099338G>A          | ENST00000367435.3_2.1:c.272G>A         | ENSP00000356405.3:p.Arg91Gln   | 26,61290323       | COSM274461                                  |
| <i>FGF2</i>    | 4:g.123815751G>T          | ENST00000264498.7_2.1:c.*2200G>T       |                                | 26,31578947       |                                             |
| <i>TERT</i>    | 5:g.1295228G>T            |                                        |                                | 25                |                                             |
| <i>RPS6KB1</i> | 17:g.58027159_58027163del | ENST00000225577.8_2.1:c.*3010_*3014del |                                | 22,5              |                                             |
| <i>ERG</i>     | 21:g.39752799T>C          | ENST00000288319.11_2.1:c.*2526A>G      |                                | 21,83908046       |                                             |
| <i>NTRK3</i>   | 15:g.88520638A>G          | ENST00000317501.7_2.1:c.*1938T>C       |                                | 21,21212121       |                                             |
| <i>SETD2</i>   | 3:g.47161694C>A           | ENST00000409792.3_2.1:c.4432G>T        | ENSP00000386759.3:p.Glu1478Ter | 21,17647059       | COSM1045472;<br>COSM1045473                 |
| <i>RET</i>     | 10:g.43622949A>T          | ENST00000340058.5_2.1:c.*747A>T        |                                | 20,96774194       |                                             |
| <i>PPARG</i>   | 3:g.12414340A>C           | ENST00000287820.10_2.1:c.83-6863A>C    |                                | 20,3539823        |                                             |
| <i>BRCA2</i>   | 13:g.32906606A>C          | ENST00000380152.7_2.1:c.991A>C         | ENSP00000369497.3:p.Lys331Gln  | 20                |                                             |
| <i>NTRK2</i>   | 9:g.87492250G>A           | ENST00000304053.10_2.1:c.*5518G>A      |                                | 19,78609626       |                                             |
| <i>NRG1</i>    | 8:g.32077742T>A           | ENST00000519301.5_1.1:c.38-375604T>A   |                                | 19,58762887       |                                             |
| <i>ETV1</i>    | 7:g.13980557T>C           | ENST00000242066.9_2.1:c.182-1686A>G    |                                | 19,56521739       |                                             |
| <i>CTNNA1</i>  | 5:g.138240092C>T          | ENST00000302763.11_2.1:c.1351C>T       | ENSP00000304669.7:p.Arg451Ter  | 19,37984496       | COSM274692                                  |
| <i>PIK3C3</i>  | 18:g.39647366C>T          | ENST00000262039.8_2.1:c.2538C>T        | ENSP00000262039.3:p.Phe846=    | 19,13043478       |                                             |
| <i>RAD50</i>   | 5:g.131939002A>C          | ENST00000378823.7_2.1:c.2218A>C        | ENSP00000368100.4:p.Ile740Leu  | 18,98734177       |                                             |
| <i>ETV1</i>    | 7:g.14007913G>A           | ENST00000242066.9_2.1:c.181+18350C>T   |                                | 18,96551724       |                                             |
| <i>SNCAIP</i>  | 5:g.121787269C>T          | ENST00000261367.11_2.1:c.2868C>T       | ENSP00000261367.7:p.Ser956=    | 18,95424837       |                                             |
| <i>SOX2</i>    | 3:g.181431062G>A          | ENST00000325404.2_2.1:c.914G>A         | ENSP00000323588.1:p.Gly305Asp  | 18,6746988        |                                             |
| <i>PTCH1</i>   | 9:g.98211513C>T           | ENST00000331920.10_2.1:c.3642G>A       | ENSP00000332353.6:p.Thr1214=   | 18,56540084       |                                             |
| <i>ATM</i>     | 11:g.108115600C>T         | ENST00000278616.8_2.1:c.748C>T         | ENSP00000278616.4:p.Arg250Ter  | 18,4              | COSM173211;<br>COSM1135092                  |
| <i>KDM5C</i>   | X:g.53226187G>A           | ENST00000375379.7_2.1:c.2662C>T        | ENSP00000364528.3:p.Arg888Cys  | 18,33333333       | COSM6909205;<br>COSM6909206;<br>COSM6909207 |
| <i>GNAS</i>    | 20:g.57429095G>A          | ENST00000371099.6_2.1:c.775G>A         | ENSP00000360140.2:p.Ala259Thr  | 18,30357143       | COSM2764846                                 |
| <i>AR</i>      | X:g.66837786G>A           | ENST00000374690.8_3.1:c.1617-25312G>A  |                                | 18,24324324       |                                             |
| <i>IGF1R</i>   | 15:g.99250946T>G          | ENST00000268035.10_2.1:c.250T>G        | ENSP00000268035.6:p.Tyr84Asp   | 18,22916667       |                                             |
| <i>PAX3</i>    | 2:g.223075998C>T          | ENST00000336840.10_2.1:c.1173+8861G>A  |                                | 18,18181818       |                                             |
| <i>NRAS</i>    | 1:g.115254575A>C          | ENST00000369535.4_2.1:c.290+1846T>G    |                                | 18,03278689       |                                             |
| <i>SPTA1</i>   | 1:g.158612202T>G          | ENST00000368147.8_2.1:c.4736A>C        | ENSP00000357129.4:p.Lys1579Thr | 17,91044776       |                                             |
| <i>LRP1B</i>   | 2:g.141113956A>G          | ENST00000389484.7_2.1:c.11485T>C       | ENSP00000374135.3:p.Cys3829Arg | 17,82945736       |                                             |
| <i>MSH2</i>    | 2:g.47639587G>T           | ENST00000233146.6_2.1:c.680G>T         | ENSP00000233146.2:p.Arg227Ile  | 17,64705882       |                                             |
| <i>MET</i>     | 7:g.116435978G>T          | ENST00000318493.10_2.1:c.4027G>T       | ENSP00000317272.6:p.Glu1343Ter | 17,46987952       |                                             |
| <i>MET</i>     | 7:g.116413278G>T          | ENST00000318493.10_2.1:c.3082+1235G>T  |                                | 17,41935484       |                                             |
| <i>MLLT3</i>   | 9:g.20413989C>T           | ENST00000380338.8_2.1:c.855G>A         | ENSP00000369695.4:p.Pro285=    | 17,36111111       | COSM3906514                                 |
| <i>STAG1</i>   | 3:g.136057274G>A          | ENST00000236698.9_2.1:c.3580C>T        | ENSP00000236698.5:p.Arg1194Ter | 17,34104046       | COSM6401575                                 |

(Continued on next page)

**SUPPLEMENTAL TABLE 3. (Continued)**

| <b>Gene</b>    | <b>Hgvsg</b>      | <b>Hgvsc</b>                          | <b>Hgvsp</b>                   | <b>% Variation (VAF)</b> | <b>COSMIC IDs (COSMIC v86)</b>                              |
|----------------|-------------------|---------------------------------------|--------------------------------|--------------------------|-------------------------------------------------------------|
| <i>EPHA5</i>   | 4:g.66467369G>A   | ENST00000273854.7_3.1:c.900C>T        | ENSP00000273854.3:p.Gly300=    | 17,27272727              |                                                             |
| <i>SMO</i>     | 7:g.128845480G>A  | ENST00000249373.7_2.1:c.777G>A        | ENSP00000249373.3:p.Ser259=    | 17,05882353              | COSM4829505                                                 |
| <i>MLLT3</i>   | 9:g.20414054T>A   | ENST00000380338.8_2.1:c.790A>T        | ENSP00000369695.4:p.Lys264Ter  | 17,00680272              |                                                             |
| <i>SH2B3</i>   | 12:g.111885567C>T | ENST00000341259.6_2.1:c.1344C>T       | ENSP00000345492.2:p.Leu448=    | 16,89189189              |                                                             |
| <i>KDM5C</i>   | X:g.53239703C>A   | ENST00000375379.7_2.1:c.1639G>T       | ENSP00000364528.3:p.Glu547Ter  | 16,88311688              |                                                             |
| <i>GRIN2A</i>  | 16:g.9857021G>A   | ENST00000330684.3_1.1:c.4380C>T       | ENSP00000332549.3:p.Ile1460=   | 16,82242991              | COSM3513409                                                 |
| <i>NRG1</i>    | 8:g.32613974G>A   | ENST00000287842.7_1.1:c.872G>A        | ENSP00000287842.4:p.Arg291Gln  | 16,66666667              | COSM2958996;<br>COSM2958997;<br>COSM5757211;<br>COSM6729597 |
| <i>SMAD2</i>   | 18:g.45391449C>A  | ENST00000262160.10_4.1:c.711G>T       | ENSP00000262160.6:p.Leu237Phe  | 16,66666667              |                                                             |
| <i>RICTOR</i>  | 5:g.38949456A>G   | ENST00000296782.9_2.1:c.4208+2T>C     |                                | 16,52173913              |                                                             |
| <i>PAX7</i>    | 1:g.19074508A>G   | ENST00000420770.6_2.1:c.*3085A>G      |                                | 16,48351648              |                                                             |
| <i>RET</i>     | 10:g.43613790C>T  | ENST00000340058.5_2.1:c.2285-31C>T    |                                | 16,47727273              |                                                             |
| <i>XPO1</i>    | 2:g.61715367C>T   | ENST00000401558.6_2.1:c.2246G>A       | ENSP00000384863.2:p.Arg749Gln  | 16,37931034              | COSM286575                                                  |
| <i>EGFR</i>    | 7:g.55269212T>G   | ENST00000275493.6_2.1:c.3114+164T>G   |                                | 16,32653061              |                                                             |
| <i>ERG</i>     | 21:g.39753723G>A  | ENST00000288319.11_2.1:c.*1602C>T     |                                | 16,31578947              |                                                             |
| <i>CTNNA1</i>  | 5:g.138223321A>C  | ENST00000302763.11_2.1:c.1286A>C      | ENSP00000304669.7:p.Lys429Thr  | 16,2601626               |                                                             |
| <i>FGF6</i>    | 12:g.4548827T>G   | ENST00000228837.2_2.1:c.450+4472A>C   |                                | 16,25                    |                                                             |
| <i>EGFR</i>    | 7:g.55268211C>T   | ENST00000275493.6_2.1:c.2946+105C>T   |                                | 16,23376623              |                                                             |
| <i>PRKDC</i>   | 8:g.48827975C>T   | ENST00000314191.6_3.1:c.2530G>A       | ENSP00000313420.3:p.Glu844Lys  | 16,07142857              |                                                             |
| <i>PRKCI</i>   | 3:g.170013719C>T  | ENST00000295797.4_2.1:c.1438C>T       | ENSP00000295797.4:p.Arg480Cys  | 15,94202899              | COSM78349                                                   |
| <i>KRAS</i>    | 12:g.25379432A>G  | ENST00000256078.8_2.1:c.291-725T>C    |                                | 15,92920354              |                                                             |
| <i>GNAS</i>    | 20:g.57484420C>T  | ENST00000265620.11_2.1:c.556C>T       | ENSP00000265620.7:p.Arg186Cys  | 15,92356688              | COSM27887;<br>COSM123397                                    |
| <i>CCND3</i>   | 6:g.41916808C>T   | ENST00000372988.8_2.1:c.-45-8485G>A   |                                | 15,74074074              |                                                             |
| <i>MYB</i>     | 6:g.135533230T>G  | ENST00000316528.12_2.1:c.2065-5772T>G |                                | 15,68627451              |                                                             |
| <i>CSF3R</i>   | 1:g.36939382G>T   | ENST00000331941.6_2.1:c.468C>A        | ENSP00000332180.5:p.Phe156Leu  | 15,6626506               |                                                             |
| <i>KRAS</i>    | 12:g.25362805C>T  | ENST00000311936.7_2.1:c.491G>A        | ENSP00000308495.3:p.Arg164Gln  | 15,6626506               | COSM41307                                                   |
| <i>NUP93</i>   | 16:g.56878418G>A  | ENST00000308159.9_2.1:c.2357G>A       | ENSP00000310668.5:p.Arg786Gln  | 15,6462585               | COSM6944930                                                 |
| <i>PAK5</i>    | 20:g.9543605C>T   | ENST00000353224.9_2.1:c.1549G>A       | ENSP00000322957.5:p.Asp517Asn  | 15,60283688              | COSM3405307                                                 |
| <i>PAX8</i>    | 2:g.113988067G>A  | ENST00000263334.9_2.1:c.1088-3234C>T  |                                | 15,56886228              |                                                             |
| <i>AKT3</i>    | 1:g.243664223T>G  | ENST00000263826.9_2.1:c.*4328A>C      |                                | 15,55555556              |                                                             |
| <i>CUX1</i>    | 7:g.101892250G>A  | ENST00000292535.11_2.1:c.4446G>A      | ENSP00000292535.7:p.Ala1482=   | 15,51724138              | COSM6638263                                                 |
| <i>ANKRD26</i> | 10:g.27342230T>G  | ENST00000376087.4_2.1:c.1635+19A>C    |                                | 15,38461538              |                                                             |
| <i>BRCA1</i>   | 17:g.41244176G>T  | ENST00000354071.7_2.1:c.3372C>A       | ENSP00000326002.7:p.Phe1124Leu | 15,38461538              |                                                             |
| <i>ETV1</i>    | 7:g.14012128C>T   | ENST00000242066.9_2.1:c.181+14135G>A  |                                | 15,38461538              |                                                             |
| <i>CHEK2</i>   | 22:g.29100312T>G  | ENST00000328354.10_2.1:c.847-758A>C   |                                | 15,25423729              |                                                             |
| <i>LATS1</i>   | 6:g.150004331G>T  | ENST00000253339.9_2.1:c.1894C>A       | ENSP00000253339.5:p.Gln632Lys  | 15,2                     |                                                             |
| <i>TMPRSS2</i> | 21:g.42837511A>G  | ENST00000332149.9_3.1:c.*558T>C       |                                | 15,18987342              |                                                             |

(Continued on next page)

**SUPPLEMENTAL TABLE 3.** (Continued)

| Gene           | Hgvsg             | Hgvsc                                 | Hgvsp                          | % Variation (VAF) | COSMIC IDs (COSMIC v86)                                                                                           |
|----------------|-------------------|---------------------------------------|--------------------------------|-------------------|-------------------------------------------------------------------------------------------------------------------|
| <i>ANKRD11</i> | 16:g.89350021T>G  | ENST00000301030.8_2.1:c.2929A>C       | ENSP00000301030.4:p.Lys977Gln  | 15,13944223       |                                                                                                                   |
| <i>DNMT1</i>   | 19:g.10250769C>T  | ENST00000340748.8_3.1:c.3711G>A       | ENSP00000345739.3:p.Ser1237=   | 15                | COSM6647722;<br>COSM6647723                                                                                       |
| <i>NRG1</i>    | 8:g.32600436C>T   | ENST00000520407.5_1.1:c.*150C>T       |                                | 14,81481481       |                                                                                                                   |
| <i>ATRX</i>    | X:g.76938028C>T   | ENST00000373344.9_2.1:c.2720G>A       | ENSP00000362441.4:p.Arg907Gln  | 14,75409836       | COSM5417529;<br>COSM6984669                                                                                       |
| <i>SDHA</i>    | 5:g.235382G>A     | ENST00000264932.10_2.1:c.1188G>A      | ENSP00000264932.6:p.Thr396=    | 14,66666667       | COSM1067099                                                                                                       |
| <i>FAT1</i>    | 4:g.187510153C>T  | ENST00000441802.6_2.1:c.13360G>A      | ENSP00000406229.2:p.Glu4454Lys | 14,5631068        | COSM275097;<br>COSM1206555                                                                                        |
| <i>PLCG2</i>   | 16:g.81888101C>T  | ENST00000359376.7_2.1:c.246C>T        | ENSP00000352336.4:p.Phe82=     | 14,47368421       | COSM3512750;<br>COSM3512751                                                                                       |
| <i>FGF14</i>   | 13:g.102912197C>A | ENST00000376131.8_2.1:c.208+141624G>T |                                | 14,38848921       |                                                                                                                   |
| <i>FAT1</i>    | 4:g.187510252C>T  | ENST00000441802.6_2.1:c.13261G>A      | ENSP00000406229.2:p.Asp4421Asn | 14,36464088       |                                                                                                                   |
| <i>BCL2L11</i> | 2:g.111883441T>G  | ENST00000308659.12_2.1:c.214+1725T>G  |                                | 14,28571429       |                                                                                                                   |
| <i>ETV1</i>    | 7:g.14017753C>A   | ENST00000242066.9_2.1:c.181+8510G>T   |                                | 14,28571429       |                                                                                                                   |
| <i>FLT1</i>    | 13:g.29008317A>C  | ENST00000282397.8_2.1:c.554T>G        | ENSP00000282397.4:p.Ile185Ser  | 14,28571429       |                                                                                                                   |
| <i>TP53</i>    | 17:g.7578212G>A   | ENST00000269305.8_2.1:c.637C>T        | ENSP00000269305.4:p.Arg213Ter  | 14,28571429       | COSM10654;<br>COSM99615;<br>COSM99616;<br>COSM99617;<br>COSM99618;<br>COSM1638393;<br>COSM3378350;<br>COSM6503267 |
| <i>TFE3</i>    | X:g.48886426C>T   | ENST00000315869.7_2.1:c.*1243G>A      |                                | 14,28571429       |                                                                                                                   |
| <i>FANCC</i>   | 9:g.97873825C>T   | ENST00000289081.7_2.1:c.1249G>A       | ENSP00000289081.3:p.Glu417Lys  | 14,21319797       | COSM1111387                                                                                                       |
| <i>TOP2A</i>   | 17:g.38566926C>T  | ENST00000423485.5_2.1:c.1203+435G>A   |                                | 14,20118343       |                                                                                                                   |
| <i>SMARCD1</i> | 12:g.50490648G>T  | ENST00000394963.8_2.1:c.1285G>T       | ENSP00000378414.4:p.Glu429Ter  | 14,19354839       |                                                                                                                   |
| <i>ETV1</i>    | 7:g.13985219T>C   | ENST00000242066.9_2.1:c.182-6348A>G   |                                | 14,16666667       |                                                                                                                   |
| <i>ROS1</i>    | 6:g.117657896C>A  | ENST00000368507.7_2.1:c.5230+439G>T   |                                | 14                |                                                                                                                   |
| <i>PMS1</i>    | 2:g.190728885T>G  | ENST00000409823.7_2.1:c.2156T>G       | ENSP00000387125.3:p.Phe719Cys  | 13,97849462       |                                                                                                                   |
| <i>SETD2</i>   | 3:g.47059132C>T   | ENST00000409792.3_2.1:c.7529G>A       | ENSP00000386759.3:p.Arg2510His | 13,95348837       | COSM1137041;<br>COSM1137042                                                                                       |
| <i>IGF1R</i>   | 15:g.99500662G>A  | ENST00000268035.10_2.1:c.4095G>A      | ENSP00000268035.6:p.Ser1365=   | 13,95348837       |                                                                                                                   |
| <i>TSPAN31</i> | 12:g.58141118C>T  | ENST00000257910.7_2.1:c.*45C>T        |                                | 13,88888889       |                                                                                                                   |
| <i>ARID2</i>   | 12:g.46287315C>T  | ENST00000334344.10_2.1:c.5260C>T      | ENSP00000335044.6:p.Arg1754Ter | 13,76811594       | COSM1628614                                                                                                       |
| <i>BCL2L11</i> | 2:g.111884231A>G  | ENST00000308659.12_2.1:c.214+2515A>G  |                                | 13,69863014       |                                                                                                                   |
| <i>CHD2</i>    | 15:g.93521585G>A  | ENST00000394196.8_1.1:c.2699G>A       | ENSP00000377747.4:p.Arg900Gln  | 13,69047619       |                                                                                                                   |

(Continued on next page)

**SUPPLEMENTAL TABLE 3.** (Continued)

| Gene           | Hgvsg             | Hgvsc                                | Hgvsp                          | % Variation (VAF) | COSMIC IDs (COSMIC v86)                     |
|----------------|-------------------|--------------------------------------|--------------------------------|-------------------|---------------------------------------------|
| <i>PIK3CA</i>  | 3:g.178916854G>A  | ENST00000263967.3_2.1:c.241G>A       | ENSP00000263967.3:p.Glu81Lys   | 13,63636364       | COSM27502;<br>COSM271871                    |
| <i>SLIT2</i>   | 4:g.20620555G>A   | ENST00000273739.9_2.1:c.4552G>A      | ENSP00000273739.5:p.Glu1518Lys | 13,63636364       | COSM3602890;<br>COSM7094272                 |
| <i>ETV1</i>    | 7:g.13993941T>G   | ENST00000242066.9_2.1:c.182-15070A>C |                                | 13,59223301       |                                             |
| <i>ETS1</i>    | 11:g.128354838C>A | ENST00000319397.6_2.1:c.610G>T       | ENSP00000324578.5:p.Asp204Tyr  | 13,55932203       |                                             |
| <i>FGFR2</i>   | 10:g.123239600C>T | ENST00000346997.6_3.1:c.2296-65G>A   |                                | 13,5483871        |                                             |
| <i>PTPRT</i>   | 20:g.40911144G>A  | ENST00000356100.6_2.1:c.2161C>T      | ENSP00000348408.2:p.Arg721Cys  | 13,53383459       | COSM2156344;<br>COSM3405085                 |
| <i>RAD51D</i>  | 17:g.33428330C>T  | ENST00000335858.11_2.1:c.457G>A      | ENSP00000338408.6:p.Gly153Arg  | 13,51351351       |                                             |
| <i>BRCA2</i>   | 13:g.32893693T>C  | ENST00000380152.7_2.1:c.316+231T>C   |                                | 13,46153846       |                                             |
| <i>TMPRSS2</i> | 21:g.42870728C>T  | ENST00000332149.9_3.1:c.-56-612G>A   |                                | 13,37579618       |                                             |
| <i>GEN1</i>    | 2:g.17962509G>A   | ENST00000317402.11_2.1:c.2030G>A     | ENSP00000318977.7:p.Arg677Gln  | 13,33333333       | COSM6670476                                 |
| <i>MAP2K1</i>  | 15:g.66729108G>A  | ENST00000307102.9_2.1:c.316G>A       | ENSP00000302486.4:p.Ala106Thr  | 13,33333333       | COSM4166155                                 |
| <i>PIK3C2G</i> | 12:g.18435196A>C  | ENST00000266497.9_2.1:c.181A>C       | ENSP00000266497.5:p.Asn61His   | 13,19444444       |                                             |
| <i>ERBB2</i>   | 17:g.37868208C>T  | ENST00000269571.9_2.1:c.929C>T       | ENSP00000269571.4:p.Ser310Phe  | 13,19444444       | COSM48358;<br>COSM5174142                   |
| <i>LAMP1</i>   | 13:g.113959969G>A | ENST00000332556.4_2.1:c.62-831G>A    |                                | 13,17829457       |                                             |
| <i>EMSY</i>    | 11:g.76169273C>T  | ENST00000334736.7_2.1:c.292C>T       | ENSP00000334130.3:p.Arg98Ter   | 13,17365269       |                                             |
| <i>RFWD2</i>   | 1:g.176153821A>G  | ENST00000308769.12_2.1:c.415T>C      | ENSP00000310943.8:p.Cys139Arg  | 13,08411215       |                                             |
| <i>MAP3K4</i>  | 6:g.161529837C>T  | ENST00000348824.11_2.1:c.4020C>T     | ENSP00000297332.10:p.Phe1340=  | 13,07692308       | COSM3024266;<br>COSM3024267                 |
| <i>PIK3R3</i>  | 1:g.46521491C>T   | ENST00000262741.9_3.1:c.917G>A       | ENSP00000262741.5:p.Arg306Gln  | 13,04347826       | COSM169023;<br>COSM5744198                  |
| <i>LATS1</i>   | 6:g.150004302G>T  | ENST00000253339.9_2.1:c.1923C>A      | ENSP00000253339.5:p.Phe641Leu  | 12,90322581       | COSM275825;<br>COSM275826;<br>COSM4875919   |
| <i>ATM</i>     | 11:g.108203492C>T | ENST00000278616.8_2.1:c.7792C>T      | ENSP00000278616.4:p.Arg2598Ter | 12,90322581       | COSM922742;<br>COSM1585338                  |
| <i>LRP1B</i>   | 2:g.140995828C>T  | ENST00000389484.7_2.1:c.13453G>A     | ENSP00000374135.3:p.Gly4485Arg | 12,90322581       |                                             |
| <i>MAGI2</i>   | 7:g.77973236T>C   | ENST00000354212.8_2.1:c.1267A>G      | ENSP00000346151.4:p.Thr423Ala  | 12,83783784       |                                             |
| <i>BCL6</i>    | 3:g.187447053G>T  | ENST00000232014.8_2.1:c.1140C>A      | ENSP00000232014.4:p.Phe380Leu  | 12,8342246        |                                             |
| <i>FAT1</i>    | 4:g.187540073C>T  | ENST00000441802.6_2.1:c.7667G>A      | ENSP00000406229.2:p.Arg2556Gln | 12,82051282       |                                             |
| <i>BRIP1</i>   | 17:g.59761290C>A  | ENST00000259008.6_2.1:c.3117G>T      | ENSP00000259008.2:p.Glu1039Asp | 12,66666667       |                                             |
| <i>NSD1</i>    | 5:g.176638070C>A  | ENST00000347982.8_3.1:c.1863C>A      | ENSP00000343209.4:p.Phe621Leu  | 12,58741259       |                                             |
| <i>PTEN</i>    | 10:g.89624260A>C  | ENST00000371953.7_2.1:c.34A>C        | ENSP00000361021.3:p.Asn12His   | 12,57142857       |                                             |
| <i>AKT3</i>    | 1:g.243736287C>A  | ENST00000263826.9_2.1:c.760G>T       | ENSP00000263826.5:p.Glu254Ter  | 12,5              | COSM6935165;<br>COSM6935166;<br>COSM6935167 |
| <i>MST1</i>    | 3:g.49723149C>T   | ENST00000449682.2_2.1:c.1267G>A      | ENSP00000414287.2:p.Glu423Lys  | 12,5              | COSM6985085                                 |

(Continued on next page)

**SUPPLEMENTAL TABLE 3.** (Continued)

| Gene           | Hgvsg             | Hgvsc                                 | Hgvsp                          | % Variation (VAF) | COSMIC IDs (COSMIC v86)                                     |
|----------------|-------------------|---------------------------------------|--------------------------------|-------------------|-------------------------------------------------------------|
| <i>CTNNA1</i>  | 5:g.138253548G>A  | ENST00000302763.11_2.1:c.1507G>A      | ENSP00000304669.7:p.Asp503Asn  | 12,5              | COSM3609084                                                 |
| <i>ROS1</i>    | 6:g.117639632T>G  | ENST00000368507.7_2.1:c.5923-217A>C   |                                | 12,5              |                                                             |
| <i>PGR</i>     | 11:g.100962530G>A | ENST00000263463.9_1.1:c.1867C>T       | ENSP00000263463.5:p.Arg623Cys  | 12,5              | COSM6970526;<br>COSM6970527                                 |
| <i>EP300</i>   | 22:g.41523587C>T  | ENST00000263253.8_2.1:c.1003C>T       | ENSP00000263253.7:p.Arg335Cys  | 12,4137931        |                                                             |
| <i>NTRK3</i>   | 15:g.88521959A>C  | ENST00000317501.7_2.1:c.*617T>G       |                                | 12,39669421       |                                                             |
| <i>NOTCH3</i>  | 19:g.15297788C>T  | ENST00000263388.6_2.1:c.1852G>A       | ENSP00000263388.1:p.Glu618Lys  | 12,39669421       | COSM992095;<br>COSM1589823                                  |
| <i>ATRX</i>    | X:g.76938995C>T   | ENST00000373344.9_2.1:c.1753G>A       | ENSP00000362441.4:p.Glu585Lys  | 12,35955056       | COSM5120258                                                 |
| <i>ACVR1B</i>  | 12:g.52370255G>A  | ENST00000257963.8_2.1:c.476G>A        | ENSP00000257963.4:p.Arg159His  | 12,35294118       | COSM273619;<br>COSM273620                                   |
| <i>ESR1</i>    | 6:g.152382165C>T  | ENST00000206249.7_2.1:c.1275C>T       | ENSP00000206249.3:p.Phe425=    | 12,34567901       | COSM3019473;<br>COSM4350665                                 |
| <i>FAT1</i>    | 4:g.187628505C>A  | ENST00000441802.6_2.1:c.2477G>T       | ENSP00000406229.2:p.Ser826Ile  | 12,32876712       |                                                             |
| <i>FGF10</i>   | 5:g.44364133G>T   | ENST00000264664.4_2.1:c.325+24327C>A  |                                | 12,32876712       |                                                             |
| <i>RANBP2</i>  | 2:g.109381319A>C  | ENST00000283195.10_2.1:c.4324A>C      | ENSP00000283195.6:p.Lys1442Gln | 12,31884058       |                                                             |
| <i>ROS1</i>    | 6:g.117652143C>T  | ENST00000368507.7_2.1:c.5231-1534G>A  |                                | 12,30769231       |                                                             |
| <i>NSD1</i>    | 5:g.176636719G>A  | ENST00000347982.8_3.1:c.512G>A        | ENSP00000343209.4:p.Arg171Gln  | 12,29508197       | COSM1436256;<br>COSM1436257                                 |
| <i>NRG1</i>    | 8:g.32617769C>T   | ENST00000287842.7_1.1:c.1128C>T       | ENSP00000287842.4:p.Ile376=    | 12,17948718       | COSM4708137;<br>COSM4708138;<br>COSM6729589;<br>COSM6729590 |
| <i>MAP3K4</i>  | 6:g.161470088G>A  | ENST00000348824.11_2.1:c.784G>A       | ENSP00000297332.10:p.Glu262Lys | 12,04188482       | COSM207464;<br>COSM207465                                   |
| <i>TFE3</i>    | X:g.48886484C>T   | ENST00000315869.7_2.1:c.*1185G>A      |                                | 12,03007519       |                                                             |
| <i>MYB</i>     | 6:g.135527548T>G  | ENST00000316528.12_2.1:c.2064+3086T>G |                                | 12                |                                                             |
| <i>ETV1</i>    | 7:g.13984979C>A   | ENST00000242066.9_2.1:c.182-6108G>T   |                                | 12                |                                                             |
| <i>ERG</i>     | 21:g.39870326C>T  | ENST00000288319.11_2.1:c.-22G>A       |                                | 12                |                                                             |
| <i>KMT2A</i>   | 11:g.118365420T>C | ENST00000389506.9_2.1:c.5292T>C       | ENSP00000374157.5:p.Arg1764=   | 11,86440678       |                                                             |
| <i>ETV1</i>    | 7:g.14004992C>T   | ENST00000242066.9_2.1:c.181+21271G>A  |                                | 11,84210526       |                                                             |
| <i>TMPRSS2</i> | 21:g.42872395T>G  | ENST00000332149.9_3.1:c.-56-2279A>C   |                                | 11,8226601        |                                                             |
| <i>EZH2</i>    | 7:g.148504761C>T  | ENST00000320356.6_2.1:c.2233G>A       | ENSP00000320147.2:p.Glu745Lys  | 11,79775281       | COSM1087033;<br>COSM1087034                                 |
| <i>ETV6</i>    | 12:g.11992197T>G  | ENST00000396373.8_2.1:c.287T>G        | ENSP00000379658.3:p.Leu96Arg   | 11,79775281       |                                                             |
| <i>SMARCD1</i> | 12:g.50481162G>A  | ENST00000381513.8_2.1:c.548G>A        | ENSP00000370924.4:p.Arg183Gln  | 11,73469388       | COSM176245;<br>COSM6924995                                  |
| <i>FANCE</i>   | 6:g.35420518G>A   | ENST00000229769.2_2.1:c.196G>A        | ENSP00000229769.2:p.Ala66Thr   | 11,67883212       |                                                             |
| <i>CDC73</i>   | 1:g.193111009A>C  | ENST00000367435.3_2.1:c.542A>C        | ENSP00000356405.3:p.Lys181Thr  | 11,66666667       |                                                             |
| <i>NKX3-1</i>  | 8:g.23536116T>C   |                                       |                                | 11,62790698       |                                                             |

(Continued on next page)



**SUPPLEMENTAL TABLE 3. (Continued)**

| <b>Gene</b>   | <b>Hgvsg</b>      | <b>Hgvsc</b>                          | <b>Hgvsp</b>                   | <b>% Variation (VAF)</b> | <b>COSMIC IDs (COSMIC v86)</b>           |
|---------------|-------------------|---------------------------------------|--------------------------------|--------------------------|------------------------------------------|
| <i>DNMT1</i>  | 19:g.10267124C>T  | ENST00000340748.8_3.1:c.1294G>A       | ENSP00000345739.3:p.Glu432Lys  | 11,62790698              | COSM266403;<br>COSM5826029               |
| <i>CASP8</i>  | 2:g.202131317A>C  | ENST00000264274.13_4.1:c.108A>C       | ENSP00000264274.9:p.Glu36Asp   | 11,61290323              |                                          |
| <i>FGF10</i>  | 5:g.44314795G>T   | ENST00000264664.4_2.1:c.326-4163C>A   |                                | 11,57024793              |                                          |
| <i>ROS1</i>   | 6:g.117739650C>T  | ENST00000368507.7_2.1:c.143G>A        | ENSP00000357493.3:p.Gly48Asp   | 11,53846154              | COSM3697372;<br>COSM3697373              |
| <i>ATRX</i>   | X:g.76778736C>T   | ENST00000373344.9_2.1:c.6843G>A       | ENSP00000362441.4:p.Glu2281=   | 11,53846154              |                                          |
| <i>ATM</i>    | 11:g.108216609C>T | ENST00000278616.8_2.1:c.8558C>T       | ENSP00000278616.4:p.Thr2853Met | 11,51515152              | COSM922753;<br>COSM1152250               |
| <i>EPHA3</i>  | 3:g.89456466T>C   | ENST00000336596.6_2.1:c.1642T>C       | ENSP00000337451.2:p.Ser548Pro  | 11,47540984              |                                          |
| <i>NTRK2</i>  | 9:g.87481353G>A   | ENST00000277120.7_2.1:c.1445-805G>A   |                                | 11,45038168              |                                          |
| <i>TFE3</i>   | X:g.48886584dup   | ENST00000315869.7_2.1:c.*1089dup      |                                | 11,42857143              |                                          |
| <i>APC</i>    | 5:g.112177049C>T  | ENST00000257430.8_2.1:c.5758C>T       | ENSP00000257430.4:p.Arg1920Ter | 11,38613861              | COSM1059619                              |
| <i>ESR1</i>   | 6:g.152265323G>A  | ENST00000206249.7_2.1:c.776G>A        | ENSP00000206249.3:p.Arg259Gln  | 11,38211382              | COSM1441227;<br>COSM5830261              |
| <i>FGF2</i>   | 4:g.123754699C>T  | ENST00000264498.7_2.1:c.577+6192C>T   |                                | 11,34020619              |                                          |
| <i>PPARG</i>  | 3:g.12414326G>A   | ENST00000287820.10_2.1:c.83-6877G>A   |                                | 11,30434783              |                                          |
| <i>CTNNA1</i> | 5:g.138261034G>A  | ENST00000302763.11_2.1:c.1837G>A      | ENSP00000304669.7:p.Asp613Asn  | 11,2244898               |                                          |
| <i>FGF9</i>   | 13:g.22275458A>C  | ENST00000382353.5_2.1:c.511A>C        | ENSP00000371790.5:p.Thr171Pro  | 11,19402985              |                                          |
| <i>NF1</i>    | 17:g.29677227C>T  | ENST00000356175.7_3.1:c.7285C>T       | ENSP00000348498.3:p.Arg2429Ter | 11,18421053              | COSM24487;<br>COSM303898;<br>COSM4619727 |
| <i>ATR</i>    | 3:g.142226864C>T  | ENST00000350721.8_2.1:c.4940G>A       | ENSP00000343741.4:p.Arg1647His | 11,17647059              | COSM205529                               |
| <i>MET</i>    | 7:g.116418932G>A  | ENST00000318493.10_2.1:c.3497G>A      | ENSP00000317272.6:p.Arg1166Gln | 11,17318436              | COSM252607                               |
| <i>APC</i>    | 5:g.112173824C>T  | ENST00000257430.8_2.1:c.2533C>T       | ENSP00000257430.4:p.Arg845Cys  | 11,11111111              |                                          |
| <i>GNAS</i>   | 20:g.57428560C>T  | ENST00000306120.3_1.1:c.50C>T         | ENSP00000302237.3:p.Ser17Phe   | 11,05263158              |                                          |
| <i>CHD2</i>   | 15:g.93467661A>C  | ENST00000394196.8_1.1:c.173A>C        | ENSP00000377747.4:p.Glu58Ala   | 11,04972376              |                                          |
| <i>NUP93</i>  | 16:g.56865770G>A  | ENST00000308159.9_2.1:c.1102G>A       | ENSP00000310668.5:p.Glu368Lys  | 11,03448276              |                                          |
| <i>BRAF</i>   | 7:g.140490174A>C  | ENST00000288602.10_2.1:c.1141-2790T>G |                                | 11,00917431              |                                          |
| <i>TAF1</i>   | X:g.70642970G>A   | ENST00000276072.7_2.1:c.4516G>A       | ENSP00000276072.3:p.Glu1506Lys | 11,00917431              |                                          |
| <i>CCND3</i>  | 6:g.41923626G>A   | ENST00000372988.8_2.1:c.-45-15303C>T  |                                | 10,98901099              |                                          |
| <i>NRG1</i>   | 8:g.32269742T>C   | ENST00000519301.5_1.1:c.38-183604T>C  |                                | 10,94890511              |                                          |
| <i>FGF6</i>   | 12:g.4554585G>A   | ENST00000228837.2_2.1:c.152C>T        | ENSP00000228837.2:p.Ser51Leu   | 10,9375                  |                                          |
| <i>EED</i>    | 11:g.85963248A>C  | ENST00000263360.10_2.1:c.326A>C       | ENSP00000263360.6:p.Asp109Ala  | 10,84337349              |                                          |
| <i>BLM</i>    | 15:g.91346896C>T  | ENST00000355112.7_2.1:c.3504C>T       | ENSP00000347232.3:p.Ile1168=   | 10,83333333              |                                          |
| <i>ERG</i>    | 21:g.39762950G>T  | ENST00000288319.11_2.1:c.886C>A       | ENSP00000288319.7:p.Leu296Ile  | 10,81081081              | COSM1030634;<br>COSM4865372              |
| <i>PDCD1</i>  | 2:g.242794903G>A  | ENST00000334409.9_2.1:c.306C>T        | ENSP00000335062.5:p.Asn102=    | 10,75268817              | COSM4093154                              |
| <i>PTPRT</i>  | 20:g.41420012G>A  | ENST00000356100.6_2.1:c.309C>T        | ENSP00000348408.2:p.Ile103=    | 10,73446328              |                                          |

(Continued on next page)

**SUPPLEMENTAL TABLE 3.** (Continued)

| Gene          | Hgvsg             | Hgvsc                                 | Hgvsp                          | % Variation (VAF) | COSMIC IDs (COSMIC v86)                  |
|---------------|-------------------|---------------------------------------|--------------------------------|-------------------|------------------------------------------|
| <i>ERBB3</i>  | 12:g.56478854G>A  | ENST00000267101.7_2.1:c.310G>A        | ENSP00000267101.3:p.Val104Met  | 10,625            | COSM20710;<br>COSM172423;<br>COSM1152549 |
| <i>PTPRD</i>  | 9:g.8339011C>T    | ENST00000355233.9_2.1:c.4072G>A       | ENSP00000347373.5:p.Ala1358Thr | 10,57692308       |                                          |
| <i>PAX3</i>   | 2:g.223068964C>T  | ENST00000336840.10_2.1:c.1174-2803G>A |                                | 10,52631579       |                                          |
| <i>FGF9</i>   | 13:g.22268428C>T  | ENST00000382353.5_2.1:c.382-6901C>T   |                                | 10,52631579       |                                          |
| <i>ETV6</i>   | 12:g.11992104A>G  | ENST00000396373.8_2.1:c.194A>G        | ENSP00000379658.3:p.Asp65Gly   | 10,49723757       |                                          |
| <i>FGFR2</i>  | 10:g.123240021G>T | ENST00000346997.6_3.1:c.2296-486C>A   |                                | 10,43478261       |                                          |
| <i>BLM</i>    | 15:g.91306210A>C  | ENST00000355112.7_2.1:c.1897A>C       | ENSP00000347232.3:p.Asn633His  | 10,41666667       |                                          |
| <i>XIAP</i>   | X:g.123019608T>G  | ENST00000355640.3_2.1:c.96T>G         | ENSP00000347858.3:p.Thr32=     | 10,41666667       |                                          |
| <i>TAF1</i>   | X:g.70602865C>T   | ENST00000276072.7_2.1:c.1858C>T       | ENSP00000276072.3:p.Arg620Trp  | 10,40462428       |                                          |
| <i>BCL2</i>   | 18:g.60985209C>T  | ENST00000589955.2_2.1:c.*73G>A        |                                | 10,38961039       |                                          |
| <i>ATM</i>    | 11:g.108201008C>T | ENST00000278616.8_2.1:c.7375C>T       | ENSP00000278616.4:p.Arg2459Cys | 10,37735849       | COSM1315810;<br>COSM6946278              |
| <i>MYB</i>    | 6:g.135536063C>T  | ENST00000316528.12_2.1:c.2065-2939C>T |                                | 10,34482759       |                                          |
| <i>TP63</i>   | 3:g.189455532C>T  | ENST00000264731.7_2.1:c.66C>T         | ENSP00000264731.3:p.Phe22=     | 10,22727273       | COSM1042482;<br>COSM1593518              |
| <i>STAT4</i>  | 2:g.191941027G>T  | ENST00000358470.8_2.1:c.298C>A        | ENSP00000351255.4:p.His100Asn  | 10,20408163       |                                          |
| <i>PTPRT</i>  | 20:g.40709556A>G  | ENST00000356100.6_2.1:c.4316T>C       | ENSP00000348408.2:p.Val1439Ala | 10,15625          |                                          |
| <i>ARID1B</i> | 6:g.157502295A>G  | ENST00000346085.9_3.1:c.3328A>G       | ENSP00000344546.4:p.Ile1110Val | 10,14492754       |                                          |
| <i>RNF43</i>  | 17:g.56435927G>A  | ENST00000407977.6_2.1:c.1210C>T       | ENSP00000385328.2:p.Arg404Cys  | 10,10638298       | COSM6957598                              |
| <i>FLT3</i>   | 13:g.28608093T>C  | ENST00000241453.11_2.1:c.1873A>G      | ENSP00000241453.7:p.Met625Val  | 10,09174312       |                                          |
| <i>KRAS</i>   | 12:g.25380275T>G  | ENST00000256078.8_2.1:c.183A>C        | ENSP00000256078.4:p.Gln61His   | 10                | COSM554;<br>COSM1135364                  |
| <i>NOTCH3</i> | 19:g.15276678C>T  | ENST00000263388.6_2.1:c.5587G>A       | ENSP00000263388.1:p.Ala1863Thr | 9,941520468       |                                          |
| <i>CTNNB1</i> | 3:g.41266930A>G   | ENST00000349496.9_2.1:c.601A>G        | ENSP00000344456.5:p.Thr201Ala  | 9,90990991        |                                          |
| <i>NUTM1</i>  | 15:g.34639501G>A  | ENST00000333756.4_2.1:c.17-669G>A     |                                | 9,87654321        |                                          |
| <i>RAF1</i>   | 3:g.12660102C>T   | ENST00000251849.8_2.1:c.119G>A        | ENSP00000251849.4:p.Arg40His   | 9,868421053       |                                          |
| <i>RAD54L</i> | 1:g.46726574C>T   | ENST00000371975.8_2.1:c.653C>T        | ENSP00000361043.4:p.Ser218Leu  | 9,826589595       |                                          |
| <i>DNMT1</i>  | 19:g.10291154C>T  | ENST00000340748.8_3.1:c.317G>A        | ENSP00000345739.3:p.Arg106His  | 9,79020979        |                                          |
| <i>CARD11</i> | 7:g.2955004G>A    | ENST00000396946.8_2.1:c.2706C>T       | ENSP00000380150.4:p.Phe902=    | 9,77443609        | COSM1088967                              |
| <i>CBL</i>    | 11:g.119144662A>T | ENST00000264033.5_2.1:c.675A>T        | ENSP00000264033.3:p.Lys225Asn  | 9,77443609        |                                          |
| <i>TP63</i>   | 3:g.189612028C>T  | ENST00000264731.7_2.1:c.1780C>T       | ENSP00000264731.3:p.Arg594Ter  | 9,770114943       | COSM285877;<br>COSM3591234               |
| <i>MAP3K4</i> | 6:g.161470139G>A  | ENST00000348824.11_2.1:c.835G>A       | ENSP00000297332.10:p.Asp279Asn | 9,770114943       |                                          |
| <i>ESR1</i>   | 6:g.152310378C>A  | ENST00000206249.7_2.1:c.1097-22413C>A |                                | 9,708737864       |                                          |
| <i>ERG</i>    | 21:g.39755032C>G  | ENST00000288319.11_2.1:c.*293G>C      |                                | 9,701492537       |                                          |
| <i>NTRK3</i>  | 15:g.88420175A>C  | ENST00000355254.6_2.1:c.2445T>G       | ENSP00000347397.3:p.Ile815Met  | 9,696969697       |                                          |
| <i>BLM</i>    | 15:g.91337445T>G  | ENST00000355112.7_2.1:c.3068T>G       | ENSP00000347232.3:p.Leu1023Trp | 9,677419355       |                                          |

(Continued on next page)

**SUPPLEMENTAL TABLE 3. (Continued)**

| Gene           | Hgvsg             | Hgvsc                                 | Hgvsp                                    | % Variation (VAF) | COSMIC IDs (COSMIC v86)                     |
|----------------|-------------------|---------------------------------------|------------------------------------------|-------------------|---------------------------------------------|
| <i>MED12</i>   | X:g.70344018G>A   | ENST00000333646.10_2.1:c.1295G>A      | ENSP00000333125.7:p.Arg432Gln            | 9,615384615       | COSM1124650;<br>COSM1124651;<br>COSM6962492 |
| <i>TBX3</i>    | 12:g.115120751C>T | ENST00000257566.7_4.1:c.255G>A        | ENSP00000257566.3:p.Ala85=               | 9,604519774       |                                             |
| <i>FGF5</i>    | 4:g.81198346G>A   | ENST00000312465.11_2.1:c.459+2180G>A  |                                          | 9,523809524       |                                             |
| <i>TBX3</i>    | 12:g.115118806C>T | ENST00000257566.7_4.1:c.535G>A        | ENSP00000257566.3:p.Glu179Lys            | 9,523809524       |                                             |
| <i>PAX7</i>    | 1:g.19073517T>G   | ENST00000420770.6_2.1:c.*2094T>G      |                                          | 9,497206704       |                                             |
| <i>SDHB</i>    | 1:g.17355174C>T   | ENST00000375499.7_2.1:c.344G>A        | ENSP00000364649.3:p.Arg115Gln            | 9,433962264       |                                             |
| <i>EMSY</i>    | 11:g.76257265C>T  | ENST00000334736.7_2.1:c.3698C>T       | ENSP00000334130.3:p.Ala1233Val           | 9,42408377        |                                             |
| <i>EPHA7</i>   | 6:g.93967915T>C   | ENST00000369303.8_2.1:c.2012A>G       | ENSP00000358309.4:p.Tyr671Cys            | 9,420289855       |                                             |
| <i>CBL</i>     | 11:g.119142446C>T | ENST00000264033.5_2.1:c.445C>T        | ENSP00000264033.3:p.Arg149Ter            | 9,375             | COSM6956649                                 |
| <i>ZFH3</i>    | 16:g.72822285G>A  | ENST00000268489.9_2.1:c.9890C>T       | ENSP00000268489.5:p.Ser3297Leu           | 9,340659341       | COSM6975521                                 |
| <i>ROS1</i>    | 6:g.117661166C>A  | ENST00000368507.7_2.1:c.5061+1132G>T  |                                          | 9,322033898       |                                             |
| <i>TSHR</i>    | 14:g.81554305C>T  | ENST00000298171.6_2.1:c.325C>T        | ENSP00000298171.2:p.Arg109Trp            | 9,322033898       | COSM3356715;<br>COSM3356716                 |
| <i>LATS1</i>   | 6:g.150023019G>A  | ENST00000253339.9_2.1:c.244C>T        | ENSP00000253339.5:p.Arg82Ter             | 9,289617486       | COSM1074464;<br>COSM1074465;<br>COSM3430104 |
| <i>ETV1</i>    | 7:g.14018531C>A   | ENST00000242066.9_2.1:c.181+7732G>T   |                                          | 9,278350515       |                                             |
| <i>CREBBP</i>  | 16:g.3778018G>A   | ENST00000262367.9_2.1:c.7030C>T       | ENSP00000262367.5:p.Arg2344Trp           | 9,223300971       | COSM172758                                  |
| <i>AKT3</i>    | 1:g.243667365C>A  | ENST00000263826.9_2.1:c.*1186G>T      |                                          | 9,210526316       |                                             |
| <i>ANKRD11</i> | 16:g.89349648dup  | ENST00000301030.8_2.1:c.3309dup       | ENSP00000301030.4:p.Asp1104Argfs<br>Ter2 | 8,965517241       | COSM5573792                                 |
| <i>PLCG2</i>   | 16:g.81990462T>C  | ENST00000564138.5_2.1:c.3733T>C       | ENSP00000482457.1:p.Tyr1245His           | 8,943089431       |                                             |
| <i>SNCAIP</i>  | 5:g.121787020G>A  | ENST00000261367.11_2.1:c.2619G>A      | ENSP00000261367.7:p.Glu873=              | 8,791208791       |                                             |
| <i>PIK3CG</i>  | 7:g.106515168C>T  | ENST00000359195.3_2.1:c.2311C>T       | ENSP00000352121.3:p.Leu771Phe            | 8,771929825       |                                             |
| <i>ROS1</i>    | 6:g.117700237A>G  | ENST00000368507.7_2.1:c.2567T>C       | ENSP00000357493.3:p.Val856Ala            | 8,724832215       |                                             |
| <i>EIF1AX</i>  | X:g.20159750C>A   | ENST00000379593.1_2.1:c.9G>T          | ENSP00000368912.1:p.Lys3Asn              | 8,724832215       |                                             |
| <i>CREBBP</i>  | 16:g.3781408C>T   | ENST00000262367.9_2.1:c.4957G>A       | ENSP00000262367.5:p.Asp1653Asn           | 8,695652174       | COSM5850890                                 |
|                | 6:g.117093570G>A  |                                       |                                          | 8,641975309       |                                             |
| <i>PAX3</i>    | 2:g.223075105C>T  | ENST00000336840.10_2.1:c.1174-8944G>A |                                          | 8,571428571       |                                             |
| <i>TET1</i>    | 10:g.70406677T>C  | ENST00000373644.4_2.1:c.4191T>C       | ENSP00000362748.4:p.Asp1397=             | 8,403361345       |                                             |
| <i>GLII</i>    | 12:g.57864115G>A  | ENST00000228682.6_2.1:c.1592G>A       | ENSP00000228682.2:p.Arg531His            | 7,894736842       |                                             |
| <i>POLE</i>    | 12:g.133250289C>A | ENST00000320574.9_3.1:c.1231G>T       | ENSP00000322570.5:p.Val411Leu            | 7,462686567       | COSM204094;<br>COSM276835                   |
| <i>ATRX</i>    | X:g.76912075C>T   | ENST00000373344.9_2.1:c.4189G>A       | ENSP00000362441.4:p.Glu1397Lys           | 7,438016529       | COSM6984665;<br>COSM6984666                 |
| <i>PTPRD</i>   | 9:g.8484212A>G    | ENST00000355233.9_2.1:c.2087T>C       | ENSP00000347373.5:p.Val696Ala            | 7,373271889       |                                             |
| <i>PAK5</i>    | 20:g.9561257C>A   | ENST00000353224.9_2.1:c.525G>T        | ENSP00000322957.5:p.Met175Ile            | 7,100591716       |                                             |
| <i>RAD50</i>   | 5:g.131944981G>T  | ENST00000378823.7_2.1:c.2929G>T       | ENSP00000368100.4:p.Glu977Ter            | 7,01754386        | COSM1223000;<br>COSM1223001                 |

(Continued on next page)

**SUPPLEMENTAL TABLE 3.** (Continued)

| Gene          | Hgvsg             | Hgvsc                               | Hgvsp                          | % Variation (VAF) | COSMIC IDs (COSMIC v86)     |
|---------------|-------------------|-------------------------------------|--------------------------------|-------------------|-----------------------------|
| <i>FGF5</i>   | 4:g.81211473A>G   | ENST00000456523.3_2.1:c.*3978A>G    |                                | 6,976744186       |                             |
| <i>MDM2</i>   | 12:g.69235947G>A  | ENST00000258149.9_2.1:c.*2318G>A    |                                | 6,593406593       |                             |
| <i>RAD21</i>  | 8:g.117875450G>A  | ENST00000297338.6_2.1:c.193C>T      | ENSP00000297338.2:p.Arg65Ter   | 6,542056075       | COSM5879130                 |
| <i>FLT1</i>   | 13:g.28962292T>G  | ENST00000615840.4_2.1:c.*1546A>C    |                                | 6,451612903       |                             |
| <i>KIT</i>    | 4:g.55573646G>A   | ENST00000288135.5_2.1:c.1115+193G>A |                                | 6,349206349       |                             |
| <i>ETV5</i>   | 3:g.185765794G>A  | ENST00000306376.9_2.1:c.*634C>T     |                                | 6,153846154       |                             |
| <i>ETV6</i>   | 12:g.12015205C>T  | ENST00000396373.8_2.1:c.464-7153C>T |                                | 6,153846154       |                             |
| <i>ATM</i>    | 11:g.108122659G>T | ENST00000278616.8_2.1:c.1703G>T     | ENSP00000278616.4:p.Arg568Ile  | 6,097560976       |                             |
| <i>IRS2</i>   | 13:g.110434933C>T | ENST00000375856.4_2.1:c.3468G>A     | ENSP00000365016.3:p.Thr1156=   | 6,010928962       |                             |
| <i>FAM46C</i> | 1:g.118166378C>T  | ENST00000369448.3_2.1:c.888C>T      | ENSP00000358458.3:p.Phe296=    | 5,913978495       |                             |
| <i>KMT2A</i>  | 11:g.118339536G>A | ENST00000389506.9_2.1:c.479G>A      | ENSP00000374157.5:p.Arg160Gln  | 5,769230769       |                             |
| <i>FOXA1</i>  | 14:g.38068641C>A  |                                     |                                | 5,755395683       |                             |
| <i>BRD4</i>   | 19:g.15364969C>T  | ENST00000263377.6_2.1:c.2152G>A     | ENSP00000263377.1:p.Glu718Lys  | 5,714285714       |                             |
| <i>APC</i>    | 5:g.112178000C>T  | ENST00000257430.8_2.1:c.6709C>T     | ENSP00000257430.4:p.Arg2237Ter | 5,699481865       | COSM1059635                 |
| <i>RICTOR</i> | 5:g.39021185C>T   | ENST00000296782.9_2.1:c.151G>A      | ENSP00000296782.5:p.Val51Ile   | 5,555555556       |                             |
| <i>GRIN2A</i> | 16:g.9927974C>A   | ENST00000330684.3_1.1:c.1765G>T     | ENSP00000332549.3:p.Ala589Ser  | 5,555555556       |                             |
| <i>MSH3</i>   | 5:g.79974872G>A   | ENST00000265081.6_2.1:c.1300G>A     | ENSP00000265081.6:p.Glu434Lys  | 5,555555556       |                             |
| <i>MDM4</i>   | 1:g.204517245A>C  | ENST00000367182.7_2.1:c.904-996A>C  |                                | 5,494505495       |                             |
| <i>ACVR1</i>  | 2:g.158617468G>A  | ENST00000263640.7_2.1:c.1188C>T     | ENSP00000263640.3:p.Phe396=    | 5,319148936       | COSM1400286                 |
| <i>FAT1</i>   | 4:g.187557799C>T  | ENST00000441802.6_2.1:c.3912G>A     | ENSP00000406229.2:p.Pro1304=   | 5,263157895       | COSM6660729;<br>COSM6660730 |
| <i>FGF23</i>  | 12:g.4488040T>G   | ENST00000237837.1_2.1:c.211+498A>C  |                                | 5,263157895       |                             |
| <i>ZFH3</i>   | 16:g.72828699C>T  | ENST00000268489.9_2.1:c.7882G>A     | ENSP00000268489.5:p.Glu2628Lys | 5,172413793       | COSM973507                  |
| <i>ARID5B</i> | 10:g.63759958A>G  | ENST00000279873.11_3.1:c.611A>G     | ENSP00000279873.7:p.Asp204Gly  | 5,142857143       |                             |
| <i>MDM2</i>   | 12:g.69222705G>A  | ENST00000258148.11_2.1:c.513G>A     | ENSP00000258148.7:p.Ser171=    | 5,109489051       | COSM942905;<br>COSM1586721  |
| <i>ETV4</i>   | 17:g.41605418G>T  | ENST00000319349.9_2.1:c.*469C>A     |                                | 5,084745763       |                             |
| <i>ZFH3</i>   | 16:g.72993278A>G  | ENST00000268489.9_2.1:c.767T>C      | ENSP00000268489.5:p.Val256Ala  | 5,076142132       |                             |
| <i>BRCA2</i>  | 13:g.32968909A>G  | ENST00000380152.7_2.1:c.9340A>G     | ENSP00000369497.3:p.Ile3114Val | 5                 |                             |
| <i>ZNF217</i> | 20:g.52193253C>T  | ENST00000302342.3_2.1:c.2050G>A     | ENSP00000304308.3:p.Glu684Lys  | 5                 | COSM6828600;<br>COSM6828601 |
| <i>RYBP</i>   | 3:g.72427569G>A   | ENST00000477973.3_4.1:c.622C>T      | ENSP00000419494.2:p.Gly208=    | 4,954954955       |                             |
| <i>BCORL1</i> | X:g.129155110G>A  | ENST00000218147.11_2.1:c.3592G>A    | ENSP00000218147.7:p.Asp1198Asn | 4,891304348       |                             |
| <i>FAT1</i>   | 4:g.187525085T>G  | ENST00000441802.6_2.1:c.10595A>C    | ENSP00000406229.2:p.Asp3532Ala | 4,666666667       |                             |
| <i>CDK8</i>   | 13:g.26959449C>A  | ENST00000381527.7_2.1:c.616C>A      | ENSP00000370938.3:p.Leu206Ile  | 4,651162791       |                             |
| <i>AXL</i>    | 19:g.41762440G>A  | ENST00000301178.8_2.1:c.2120G>A     | ENSP00000301178.3:p.Arg707His  | 4,516129032       |                             |
| <i>PTPRD</i>  | 9:g.8471072T>C    | ENST00000355233.9_2.1:c.2194A>G     | ENSP00000347373.5:p.Ile732Val  | 4,494382022       |                             |
| <i>LATS2</i>  | 13:g.21557415G>A  | ENST00000382592.4_2.1:c.2430C>T     | ENSP00000372035.4:p.Phe810=    | 4,347826087       |                             |
| <i>ETS1</i>   | 11:g.128331458A>C | ENST00000392668.8_2.1:c.*798T>G     |                                | 4,285714286       |                             |
| <i>NUP93</i>  | 16:g.56868048G>A  | ENST00000308159.9_2.1:c.1546G>A     | ENSP00000310668.5:p.Glu516Lys  | 4,278074866       |                             |

(Continued on next page)

**SUPPLEMENTAL TABLE 3.** (Continued)

| <b>Gene</b>   | <b>Hgvs_g</b>     | <b>Hgvs_c</b>                         | <b>Hgvs_p</b>                  | <b>% Variation (VAF)</b> | <b>COSMIC IDs (COSMIC v86)</b> |
|---------------|-------------------|---------------------------------------|--------------------------------|--------------------------|--------------------------------|
| <i>CSF1R</i>  | 5:g.149449464G>A  | ENST00000286301.7_2.1:c.1482C>T       | ENSP00000286301.3:p.Gly494=    | 4,278074866              |                                |
| <i>SMC1A</i>  | X:g.53409534C>T   | ENST00000322213.8_2.1:c.3178G>A       | ENSP00000323421.3:p.Glu1060Lys | 4,245283019              | COSM1468548                    |
| <i>AR</i>     | X:g.66765082G>A   | ENST00000374690.8_3.1:c.94G>A         | ENSP00000363822.3:p.Glu32Lys   | 4,242424242              | COSM1468963                    |
| <i>PAX7</i>   | 1:g.19072474T>C   | ENST00000420770.6_2.1:c.*1051T>C      |                                | 4,081632653              |                                |
| <i>FYN</i>    | 6:g.112024169G>A  | ENST00000229471.8_2.1:c.616C>T        | ENSP00000229471.4:p.Arg206Cys  | 4,026845638              | COSM281268;<br>COSM3156578     |
| <i>TAF1</i>   | X:g.70683706C>T   | ENST00000276072.7_2.1:c.5492C>T       | ENSP00000276072.3:p.Ser1831Leu | 4,022988506              |                                |
| <i>ETV1</i>   | 7:g.13949261G>A   | ENST00000242066.9_2.1:c.882C>T        | ENSP00000242066.5:p.Phe294=    | 3,93258427               | COSM1086161;<br>COSM1596796    |
| <i>NKX3-1</i> | 8:g.23536040C>T   |                                       |                                | 3,846153846              |                                |
| <i>TET2</i>   | 4:g.106159840A>G  | ENST00000305737.6_3.1:c.*1243A>G      |                                | 3,759398496              |                                |
| <i>PAX3</i>   | 2:g.223078047C>A  | ENST00000336840.10_2.1:c.1173+6812G>T |                                | 3,571428571              |                                |
| <i>NCOR1</i>  | 17:g.16068429G>A  | ENST00000268712.7_2.1:c.482C>T        | ENSP00000268712.2:p.Ser161Leu  | 3,50877193               |                                |
| <i>MSH6</i>   | 2:g.48025925A>C   | ENST00000234420.9_2.1:c.803A>C        | ENSP00000234420.4:p.Asp268Ala  | 3,488372093              |                                |
| <i>SMC3</i>   | 10:g.112362386T>C | ENST00000361804.4_2.1:c.3260T>C       | ENSP00000354720.4:p.Val1087Ala | 3,240740741              |                                |
| <i>NTRK2</i>  | 9:g.87427572C>T   | ENST00000359847.3_2.1:c.*2078C>T      |                                | 3,141361257              |                                |
| <i>CHD2</i>   | 15:g.93467647G>A  | ENST00000394196.8_1.1:c.159G>A        | ENSP00000377747.4:p.Ser53=     | 3,017241379              |                                |
| <i>PAX8</i>   | 2:g.113980449A>C  | ENST00000263334.9_2.1:c.1190-2694T>G  |                                | 3,017241379              |                                |
| <i>PPM1D</i>  | 17:g.58740503G>T  | ENST00000305921.7_2.1:c.1408G>T       | ENSP00000306682.2:p.Asp470Tyr  | 2,941176471              |                                |
| <i>PTPRD</i>  | 9:g.8484287G>T    | ENST00000355233.9_2.1:c.2012C>A       | ENSP00000347373.5:p.Ser671Ter  | 2,745098039              |                                |

## REFERENCES

1. Eijkelenboom A, Kamping EJ, Kastner-van Raaij AW, et al. Reliable next-generation sequencing of formalin-fixed, paraffin-embedded tissue using single molecule tags. *J Mol Diagn.* 2016;18:851-863.
2. Kroeze LI, de Voer RM, Kamping EJ, et al. Evaluation of a hybrid capture-based pan-cancer panel for analysis of treatment stratifying oncogenic aberrations and processes. *J Mol Diagn.* 2020 Mar 20. [Epub ahead of print].
